# Supplementary material for: CD84 is a regulator of the immunosuppressive microenvironment in multiple myeloma
Source: PubMed Central journal article supplement (PMC7934939; doi:10.1172/jci.insight.141683), 2021-02-22
Supplement: jciinsight-6-141683-s097.pdf [file jciinsight-6-141683-s097.pdf]

Supplementary tables

Table 1 Patient List

| Patient | Age | Gender | High risk features (t(4;14), del17p, add 1q, S-phase>3%) one or more of these present | Stage of disease     | State of disease (relapsed / relapsed and refractory) | Current therapy | Previous transplant | Figure                                                                               |
|---------|-----|--------|---------------------------------------------------------------------------------------|----------------------|-------------------------------------------------------|-----------------|---------------------|--------------------------------------------------------------------------------------|
| 1       | NA  | NA     | NA                                                                                    | NA                   | NA                                                    | NA              | NA                  | 1A, 1G, 1H, 2H, 5M, 5Q                                                               |
| 2       | 80  | M      | del17p                                                                                | I                    | VGPR                                                  | RVD             | no                  | 1A, 2G, 2H, 5D, 5F, 5M, 5O, 5Q, 5A, 5B, 5C, S3A, S3C, S3E                            |
| 3       | 84  | M      | No                                                                                    | III                  | VGPR                                                  | RVD             | no                  | 1A, 2H, 5M, 5Q, 5J, 5K, 5L, S3D, S3G                                                 |
| 4       | 70  | M      | NA                                                                                    | Smoldering           | VGPR                                                  |                 | no                  | 1A, 1B, 1G, 1H                                                                       |
| 5       | 68  | M      | NA                                                                                    | Smoldering           | Stable disease                                        | untreated       | no                  | 1A, 1B                                                                               |
| 6       | 71  | M      | NA                                                                                    | II                   | Stable disease                                        | Vel-dex         | no                  | 1A                                                                                   |
| 7       | 94  | M      | NA                                                                                    | III                  | VGPR                                                  | RVD             | no                  | 1A, 3D, 3E, 3F, 3G, 3J, 3K                                                           |
| 8       | 78  | F      | Myeloma not proved                                                                    | Smoldering           | Stable disease                                        | untreated       | no                  | 1A, 1B, 3E, 3F, 3G, 3K                                                               |
| 9       | 84  | M      | NA                                                                                    | III                  | PR                                                    | RVD             | no                  | 1A, 1G, 1H, 2H, 3D, 3E, 3G, 3H, 3I, 3J, 3K, 5E, 5G, 5M, 5N, 5O, 5P, 5Q, 5R, S3A, S3B |
| 10      |     |        |                                                                                       | MGUS                 |                                                       |                 |                     | 1A                                                                                   |
| 11      | 85  | M      | Hyperdiploid (low risk)                                                               | I                    | VGPR                                                  | Vel-Dex         | no                  | 1A, 2B                                                                               |
| 12      | 82  | M      | NA                                                                                    | II                   | Refractory                                            | Vel-Dex         | no                  | 1A, 1B, 2A                                                                           |
| 13      | NA  | NA     | NA                                                                                    | NA                   | NA                                                    | NA              | NA                  |                                                                                      |
| 14      | 79  | F      | del P53 ,gain 1q21, del 1p32, t(11;14),del 13q                                        | PLASMA CELL LEUKEMIA | Refractory                                            | VCD             | no                  | 1A, 1B, 2A                                                                           |
| 15      |     |        |                                                                                       | MGUS                 |                                                       |                 |                     | 1A                                                                                   |
| 16      | 64  | F      | 1 q gain                                                                              | Smoldering           | Stable disease                                        | untreated       | no                  | 1A, 1G, 1H, 2H, 5M, 5O, 5J, 5K, 5L, S3D, S3G, 5A, 5B, 5C,                            |

|    |    |    |                                              |                         |                     |                                   |                |                                                                                             |
|----|----|----|----------------------------------------------|-------------------------|---------------------|-----------------------------------|----------------|---------------------------------------------------------------------------------------------|
|    |    |    |                                              |                         |                     |                                   |                | S3A,<br>S3C, S3E                                                                            |
| 17 | 65 | F  | NA                                           | III                     | VGPR                | VCD                               | yes            | 1A, 5D,<br>5E, 5O,<br>5Q, 5J,<br>5K, 5L,<br>S3D,<br>S3G, 5A,<br>5B, 5C,<br>S3A,<br>S3C, S3E |
| 18 | 79 | F  | NA                                           | PCL                     | refractory          | Dexa                              | no             | 1A, 1G,<br>1H, 2G,<br>2H, 5D,<br>5E, 5M,<br>5A, 5B,<br>5C, S3A,<br>S3C, S3E                 |
| 19 | NA | NA | NA                                           | NA                      | NA                  | NA                                | NA             | 1B                                                                                          |
| 20 | NA | NA | NA                                           | NA                      | NA                  | NA                                | NA             | 1B, 2B                                                                                      |
| 21 | 82 | F  | NA                                           | II                      | Partial<br>response | VMP                               | no             | 1B, 2B                                                                                      |
| 22 | 60 | M  | 1q21 gain, del 13q,<br>t(4:14 translocation) | II                      | PR                  | VCD                               |                | 1B, 2A                                                                                      |
| 23 | 84 | F  | NA                                           | II                      | refractory          | Vel-Dex                           | no             | 2A                                                                                          |
| 24 | 60 | F  | NA                                           | II                      |                     |                                   | no             | 2A, 2B                                                                                      |
| 25 | 73 | M  | NA                                           | III                     | refractory          | Vel-Dex                           | no             | 3D, 3E,<br>3H, 3I,<br>3J, 3K,<br>5E, 5G,<br>5N, 5P,<br>5R                                   |
| 26 | NA | NA | NA                                           | NA                      | NA                  | NA                                | NA             | 1A, 1G,<br>3D, 3E,<br>3H, 3I,<br>3J, 3K                                                     |
| 27 | NA | NA | NA                                           | Plasma cell<br>leukemia | NA                  | NA                                | NA             | 1A, 1G,<br>1H, 3D,<br>3E, 3F,<br>3G, 3H,<br>3I, 3J, 3K                                      |
| 28 | NA | NA | NA                                           | NA                      | NA                  | NA                                | NA             | 3D, 3E,<br>3F, 3G,<br>3H, 3J,<br>3K                                                         |
| 29 | 70 | F  | t(14:16)<br>1q21+<br>Del13q                  | ISS I                   | Newly<br>diagnosed  | no                                | no             | 1A, 1G,<br>1H, 5E,<br>5G, 5N,<br>5P, 5R                                                     |
| 30 | 82 | F  | 1q21+<br>Del13q                              | ISS II                  | Newly<br>diagnosed  | no                                | no             | 1A, 1G,<br>1H, 3D,<br>3E, 3F,<br>3G, 3H,<br>5E, 5G                                          |
| 31 | 75 | F  | 1q21+<br>hyperdiploid                        | Not done                | Partial<br>response | Thal+<br>Cycloph<br><br>VCD<br>RD | 2009<br>2014   | 3D, 3E,<br>3G, 3I,<br>3K, 5E,<br>5G, 5N,<br>5P, 5R                                          |
| 32 | 68 | M  | Del17p<br>1q21+<br>Del13q                    | ISS III                 | VGPR                | PACE<br>VCD                       | 01/19<br>05/19 | 3D, 3E,<br>3G, 3K,<br>5E, 5G,                                                               |

|    |    |    |                                                |                         |                     |                                           |                |                                                        |
|----|----|----|------------------------------------------------|-------------------------|---------------------|-------------------------------------------|----------------|--------------------------------------------------------|
|    |    |    | T(14:16)<br>1p32-                              |                         |                     | Velcade<br>maintenan<br>ce                |                | 5N, 5P,<br>5R                                          |
| 26 | NA | NA | NA                                             | NA                      | NA                  | NA                                        | NA             | 1A, 1G,<br>3D, 3E,<br>3H, 3I,<br>3J, 3K                |
| 27 | NA | NA | NA                                             | Plasma cell<br>leukemia | NA                  | NA                                        | NA             | 1A, 1G,<br>1H, 3D,<br>3E, 3F,<br>3G, 3H,<br>3I, 3J, 3K |
| 28 | NA | NA | NA                                             | NA                      | NA                  | NA                                        | NA             | 3D, 3E,<br>3F, 3G,<br>3H, 3J,<br>3K                    |
| 29 | 70 | F  | t(14:16)<br>1q21+<br>Del13q                    | ISS I                   | Newly<br>diagnosed  | no                                        | no             | 1A, 1G,<br>1H, 5E,<br>5G, 5N,<br>5P, 5R                |
| 30 | 82 | F  | 1q21+<br>Del13q                                | ISS II                  | Newly<br>diagnosed  | no                                        | no             | 1A, 1G,<br>1H, 3D,<br>3E, 3F,<br>3G, 3H,<br>5E, 5G     |
| 31 | 75 | F  | 1q21+<br>hyperdiploid                          | Not done                | Partial<br>response | Thal+<br>Cycloph<br><br>VCD<br>RD         | 2009<br>2014   | 3D, 3E,<br>3G, 3I,<br>3K, 5E,<br>5G, 5N,<br>5P, 5R     |
| 32 | 68 | M  | Del17p<br>1q21+<br>Del13q<br>T(14:16)<br>1p32- | ISS III                 | VGPR                | PACE<br>VCD<br>Velcade<br>maintenan<br>ce | 01/19<br>05/19 | 3D, 3E,<br>3G, 3K,<br>5E, 5G,<br>5N, 5P,<br>5R         |

Patients #24 and pat # 17 are the same patient in different time points – diagnosis and relapse (the earlier is at diagnosis).  
At diagnosis she reponded to treatment. At relapse she was refractory

NA= not available

VGPR= very good partial response

RVD = Revlimide + Velcade + Dexamethasone

DD= Daratumumab + Dexamethasone

Table 2 Real-Time Primers

| target | species | forward primer          | reverse primer           |
|--------|---------|-------------------------|--------------------------|
| HIF1a  | human   | GAACGTCGAAAAGAAAAGTCTCG | CCTTATCAAGATGCGAACTCAC   |
| CD84   | human   | TTGTTCCGTTTGTTCAGAG     | CGGAATAAACTGTGTTCACTG    |
| S100A9 | human   | GTCGCAGCTGGAACGCAACA    | CCTGGCCTCCTGATTAGTGG     |
| CYBA   | human   | ATGGGGCAGATCGAGTGGGCCAT | GTAGATGCCGCTCGCAATGGCCAA |
| CMTM6  | human   | ATGAAGGCCAGCAGAGACAG    | GTGTACAGCCCCACTACGGA     |
| BCL2A1 | human   | GTCATCCAGCCAGATTTAGGTTC | CCCGGATGTGGATACCTATAAGG  |
| PSMB2  | human   | AGGTTGGCAGATTCAGGATG    | AGAGGGCAGTGGAACCTCCTT    |
| PD-L1  | human   | TGGCATTGCTGAACGCATTT    | AGTGCAGCCAGGTCTAATTGT    |
| Bcl2   | mouse   | GCTACCGTCGTGACTT        | GCCGGTTCAGGTACTC         |
| Rpl32  | mouse   | TTAAGCGAAACTGGCGGGAAAC  | TTGTTGCTCCCATAACCGATG    |
| CD84   | mouse   | ATATAGCTGGAGTCCCTTTGGAG | AAAGAGCACGGCCAATCCTC     |
| PD-L1  | mouse   | GAGCTGATCATCCCAGAACTGC  | GACCGTGGACACTACAATGAGGA  |
| CMTM6  | mouse   | ATGGAGAACGGAGCGGTCTA    | CACACTCGGACACAACCTCT     |
| BCL2A1 | mouse   | TGGAAACTTGTTTGTAAGCACGT | CTTCAGTATGTGGCTACAGGTACC |
| CYBA   | mouse   | AGATCGAGTGGGCCATGT      | ACCACTGTGTGAAACGTCCA     |
| S100A9 | mouse   | CACAGTTGGCAACCTTTATG    | CAGCTGATTGTCCTGGTTTG     |

Table 3 List of antibodies used

| Target                                        | Species     | Fluorophore           | Company                   | Clone          |
|-----------------------------------------------|-------------|-----------------------|---------------------------|----------------|
| CD138                                         | Mouse       | APC                   | BD bioscience             | 281-2          |
| PD-L1                                         | Human       | PE/CY7                | Biolegend                 | 29E.2A3        |
| PD-L1                                         | Mouse       | BV711                 | Biolegend                 | 10F.9G2        |
| B220/CD45R                                    | Human/Mouse | FITC or APC           | Biolegend                 | RA3-6B2        |
| CD38                                          | Human       | FITC/PE               | Biolegend                 | HIT2           |
| CD19                                          | Human       | APC-CY7               | Biolegend                 | HIB19          |
| CD3                                           | Mouse       | APC-CY7               | Biolegend                 | 145-2C11       |
| CD3                                           | Human       | Pacific blue          | Biolegend                 | UCHT1          |
| CD4                                           | Mouse       | FITC/PerCP-Cyanine5.5 | Biolegend/BioGems         | RMA4-5/GK1.5   |
| CD4                                           | Human       | FITC                  | Biolegend                 | OKT4           |
| CD8                                           | Mouse       | PE                    | Biolegend                 | 53-6.7         |
| CD8                                           | Human       | APC-CY7               | Biolegend                 | HIT8a          |
| PD1                                           | Mouse       | PE/CY7                | Biolegend                 | 29F.1A12       |
| PD1                                           | Human       | BV711                 | BD Biosciences            | EH12.1         |
| Lag-3                                         | Mouse       | PE                    | BD Biosciences            | C9B7W          |
| Lag-3                                         | Human       | APC                   | Biolegend                 | 11C3C65        |
| CTLA-4                                        | Mouse       | APC                   | Biolegend                 | UC10-4B9       |
| CTLA-4                                        | Human       | PE-CY7                | Biolegend                 | L3D10          |
| 2B4                                           | Mouse       | FITC                  | Biolegend                 | m2B4.(B6)45B.1 |
| KLRG-1                                        | Mouse       | Efluor405             | eBioescience              | KLRG1          |
| LAMP-1                                        | Mouse       | PE                    | Biolegend                 | 1D48           |
| Granzyme B                                    | Mouse/Human | APC                   | Biolegend                 | GB11           |
| IL-2                                          | Mouse       | PE-CY7                | Biolegend                 | JES6-5H4       |
| IFNgamma                                      | Mouse       | Pacific blue          | Biolegend                 | XMG1.2         |
| S100A9                                        | Mouse/Human | APC                   | ThermoFisher Scientific   | MAC387         |
| CMTM-6                                        | Mouse/Human | unconjugated          | St John's Laboratory      |                |
| CYBA                                          | Mouse/Human | unconjugated          | St John's Laboratory      |                |
| BCL2A1                                        | Mouse/Human | unconjugated          | St John's Laboratory      |                |
| HIF1 $\alpha$                                 | Mouse/Human | PE                    | RnD Systems               | 241812         |
| Goat Anti-Rabbit IgG,<br>Fc Fragment Specific | Anti-Rabbit | Alexa fluor 647       | Jackson<br>ImmunoResearch |                |

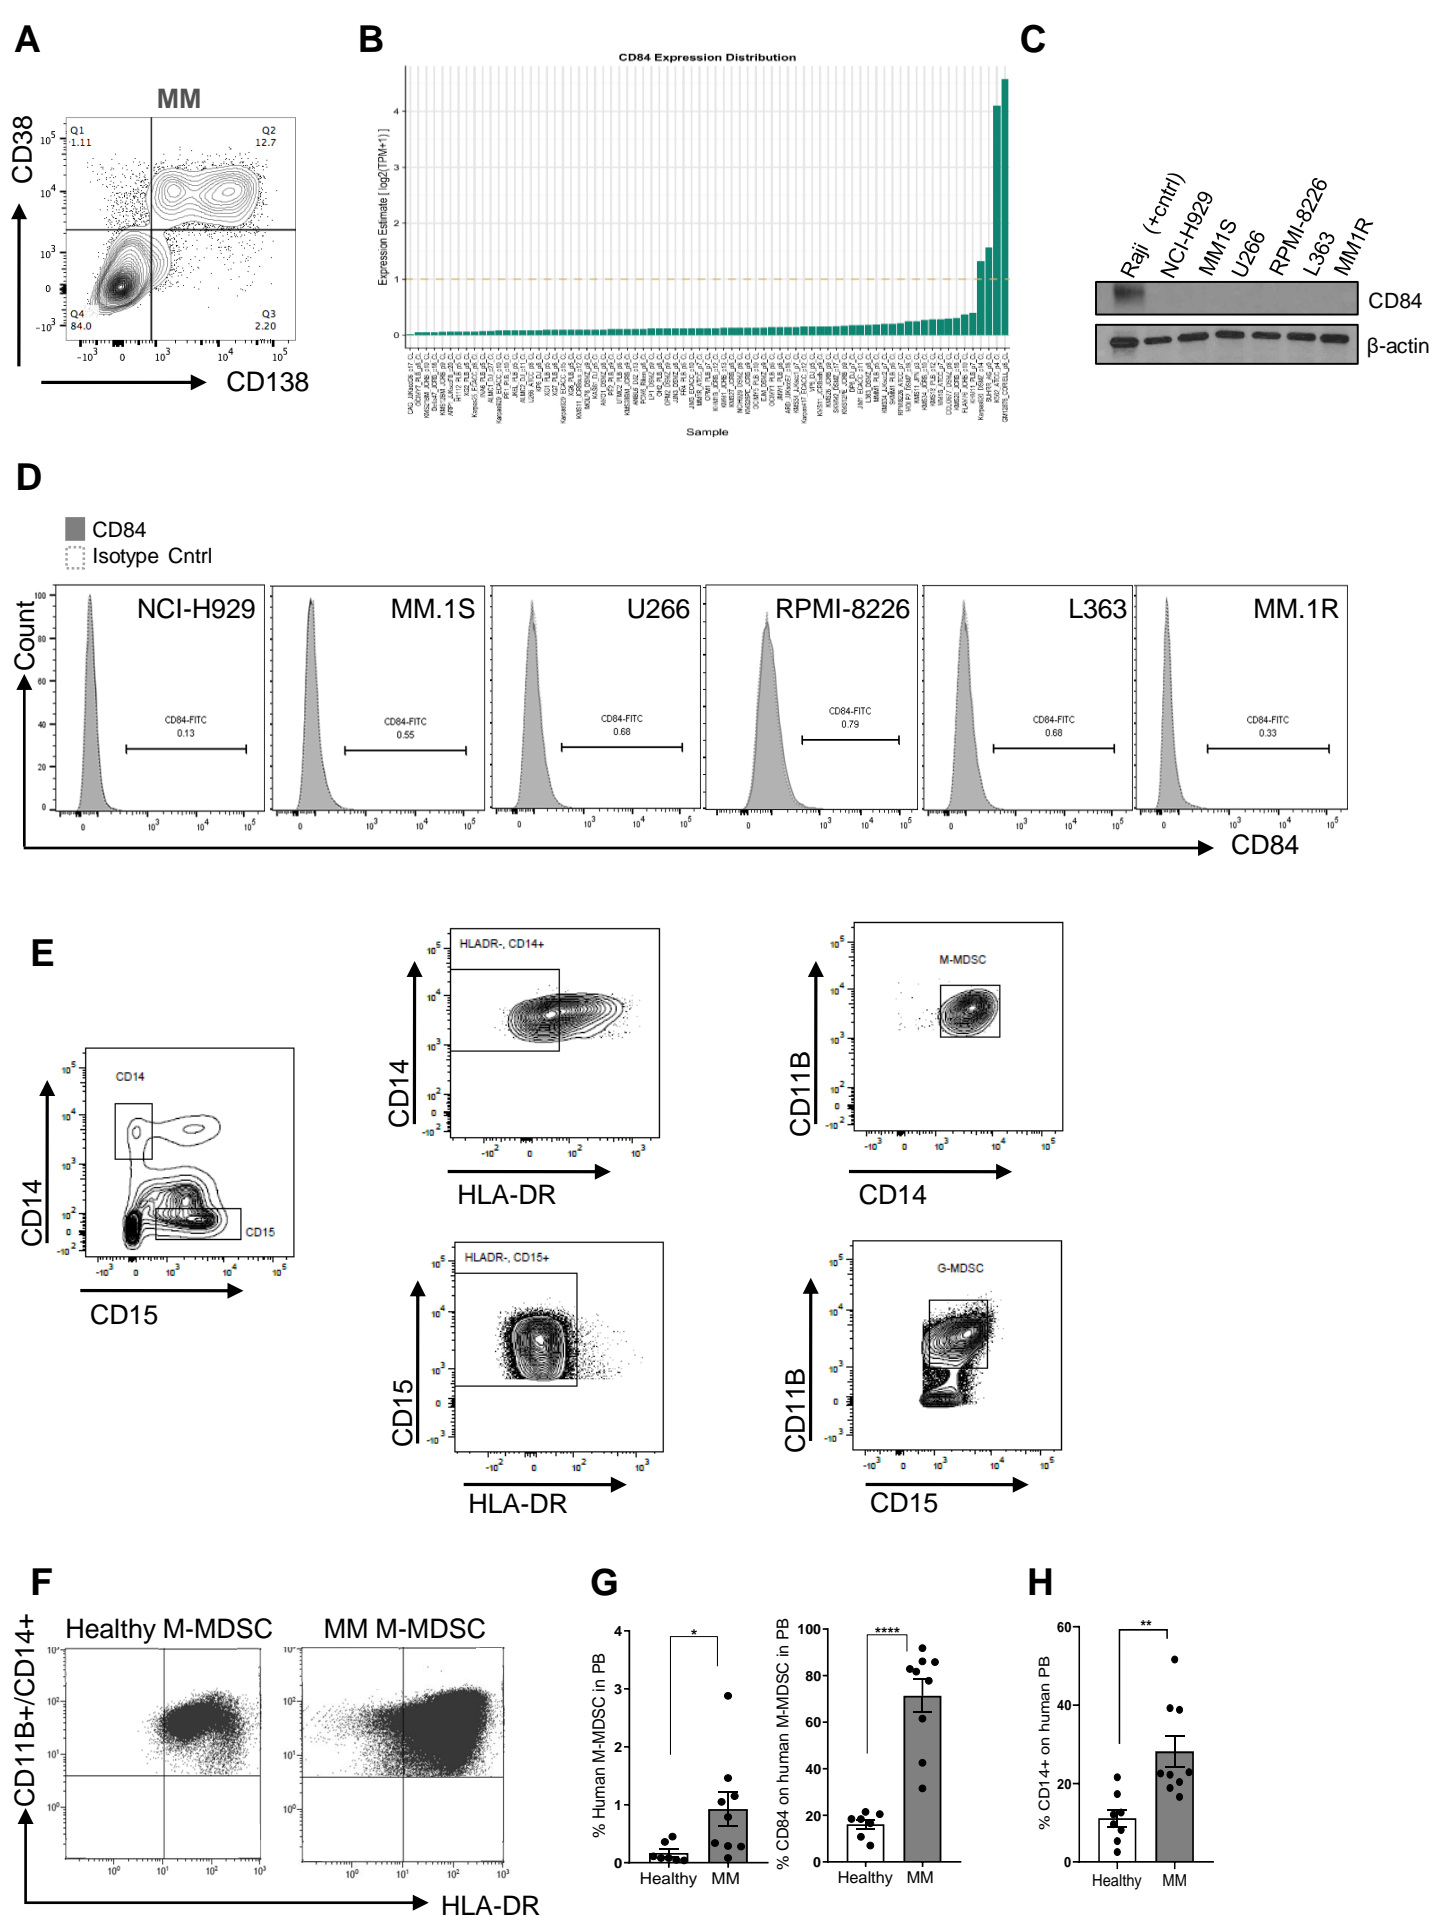

**Figure S1 - CD84 expression in MM and MDSCs**

**(A)** Gating strategy for CD38<sup>+</sup>CD138<sup>+</sup> primary human MM cells. **(B)** mRNA levels of CD84 in various MM cell lines. Data was taken from CoMMpass IA9 dataset. **(C)** CD84 protein expression was determined on six human MM cell lines by western blot analysis. **(D)** CD84 expression on six human MM cell lines analyzed by flow cytometry. **(E)** Gating strategy for G- and M- MDSCs. **(F)** Gating of CD14<sup>+</sup>, CD11B<sup>+</sup>, CD15<sup>-</sup>, HLA-DR<sup>-</sup> M-MDSCs in PB derived from Healthy or MM patients. Representative dot plots are shown on the left (n=7-9, \*\*\*\*p<0.0001). **(G)** Percentage of M-MDSCs and CD84 expression on M-MDSCs in PB and BM derived from Healthy or MM patients (n=5-9, \*\*p<0.01). **(H)** Percentage of CD14<sup>+</sup> populations in PB derived from Healthy or MM patients (n=5-9, \*\*p<0.01).

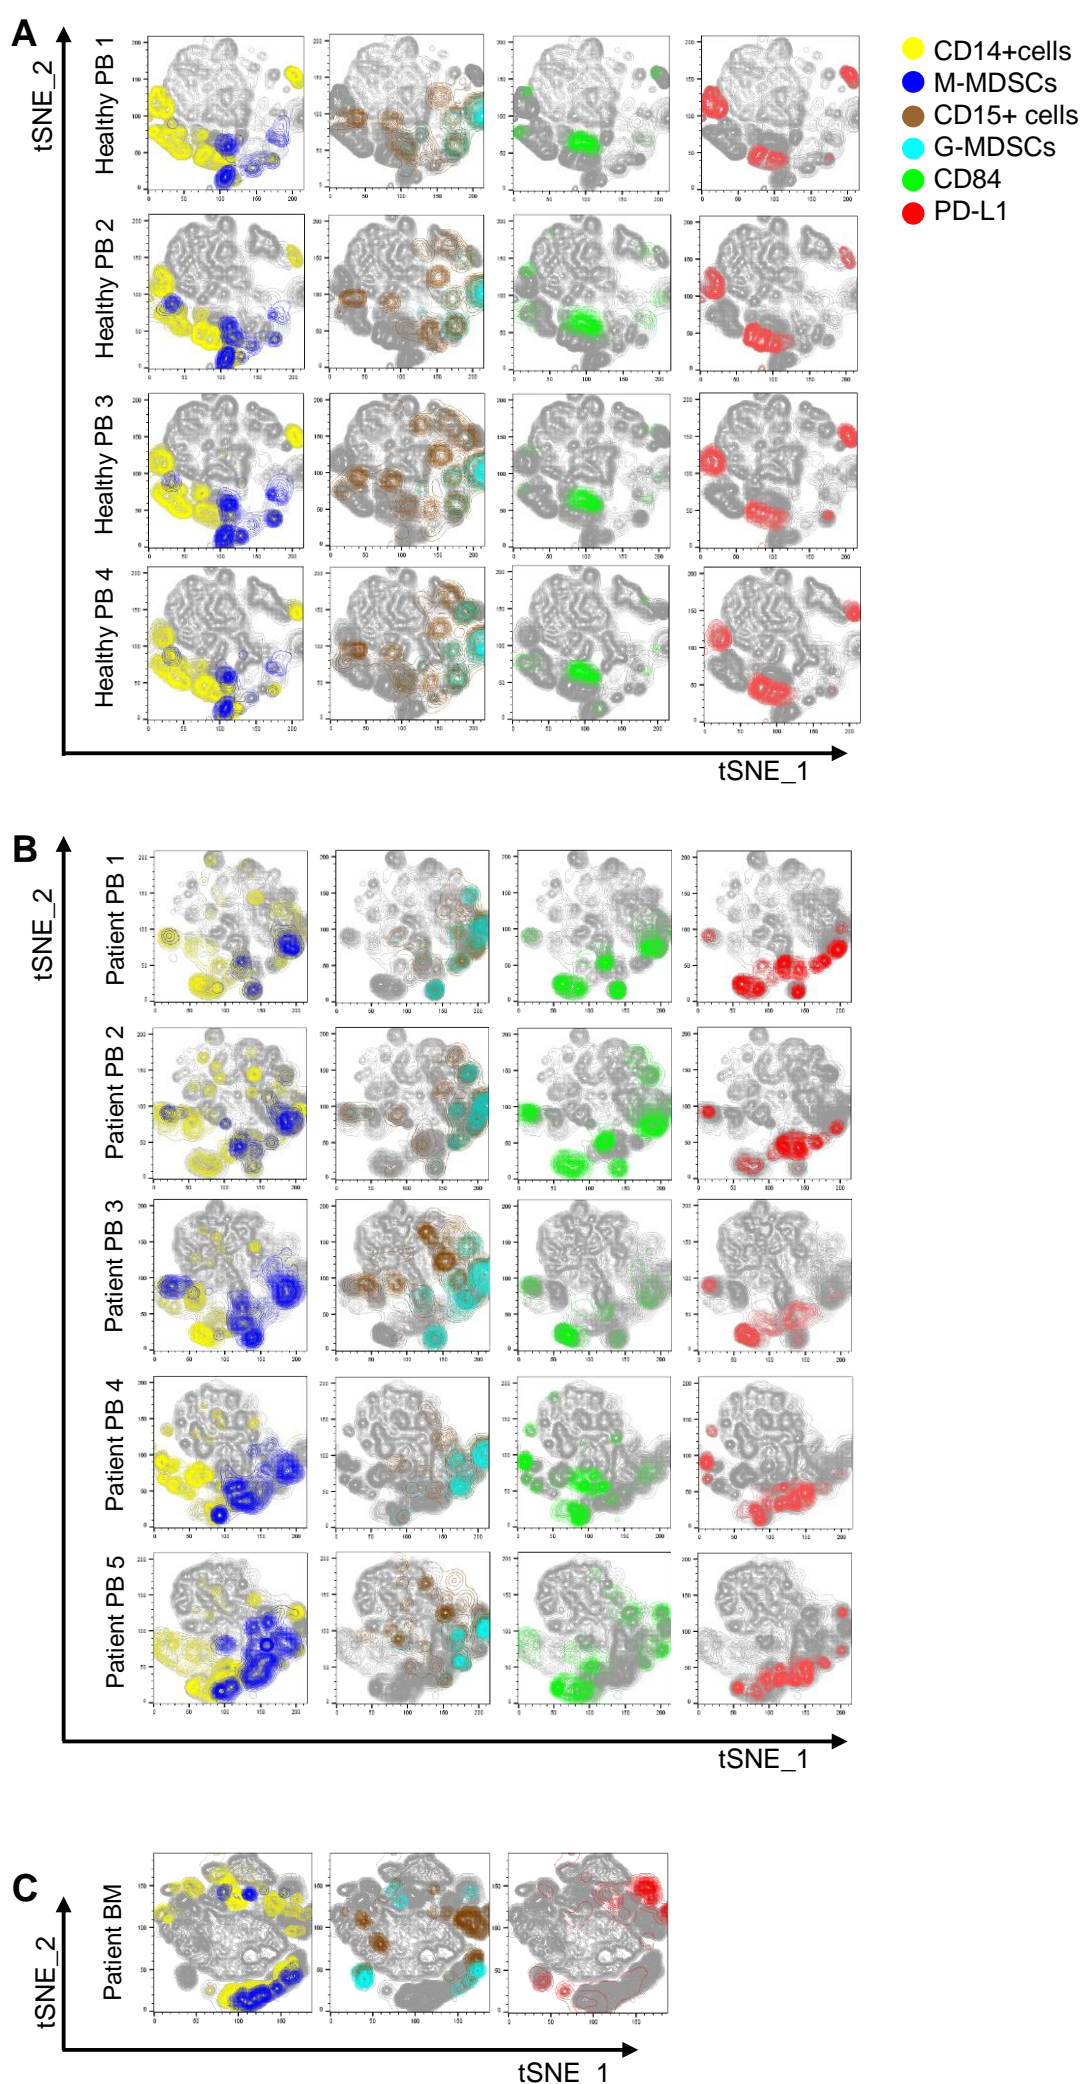

**Figure S2 - t-SNE plots of MDSCs from healthy and MM donors**

**(A-B)** t-SNE plots based on CD14+, CD15+, M-MDSC, G-MDSC, CD84+ and PD-L1+ cells from PB of healthy donors (A), and MM patients (B). **(C)** Representative t-SNE plots based on CD14+, CD15+, M-MDSC, G-MDSC, and PD-L1 + cells from BM derived from MM patient samples. t-SNE was run with no PCA step, perplexity = 30, 1000 iterations. From each of the samples, 200,000 cells were randomly selected. Cells are colored according to the expression level of CD14+/CD15- for CD14; CD14+/CD15-/CD11b+/HLA-DR low/- for M-MDSC; CD15+/CD14- for CD15; and CD15+/CD14-/CD11b+/HLA-DR low/- for G-MDSC, CD84, and PD-L1 markers.

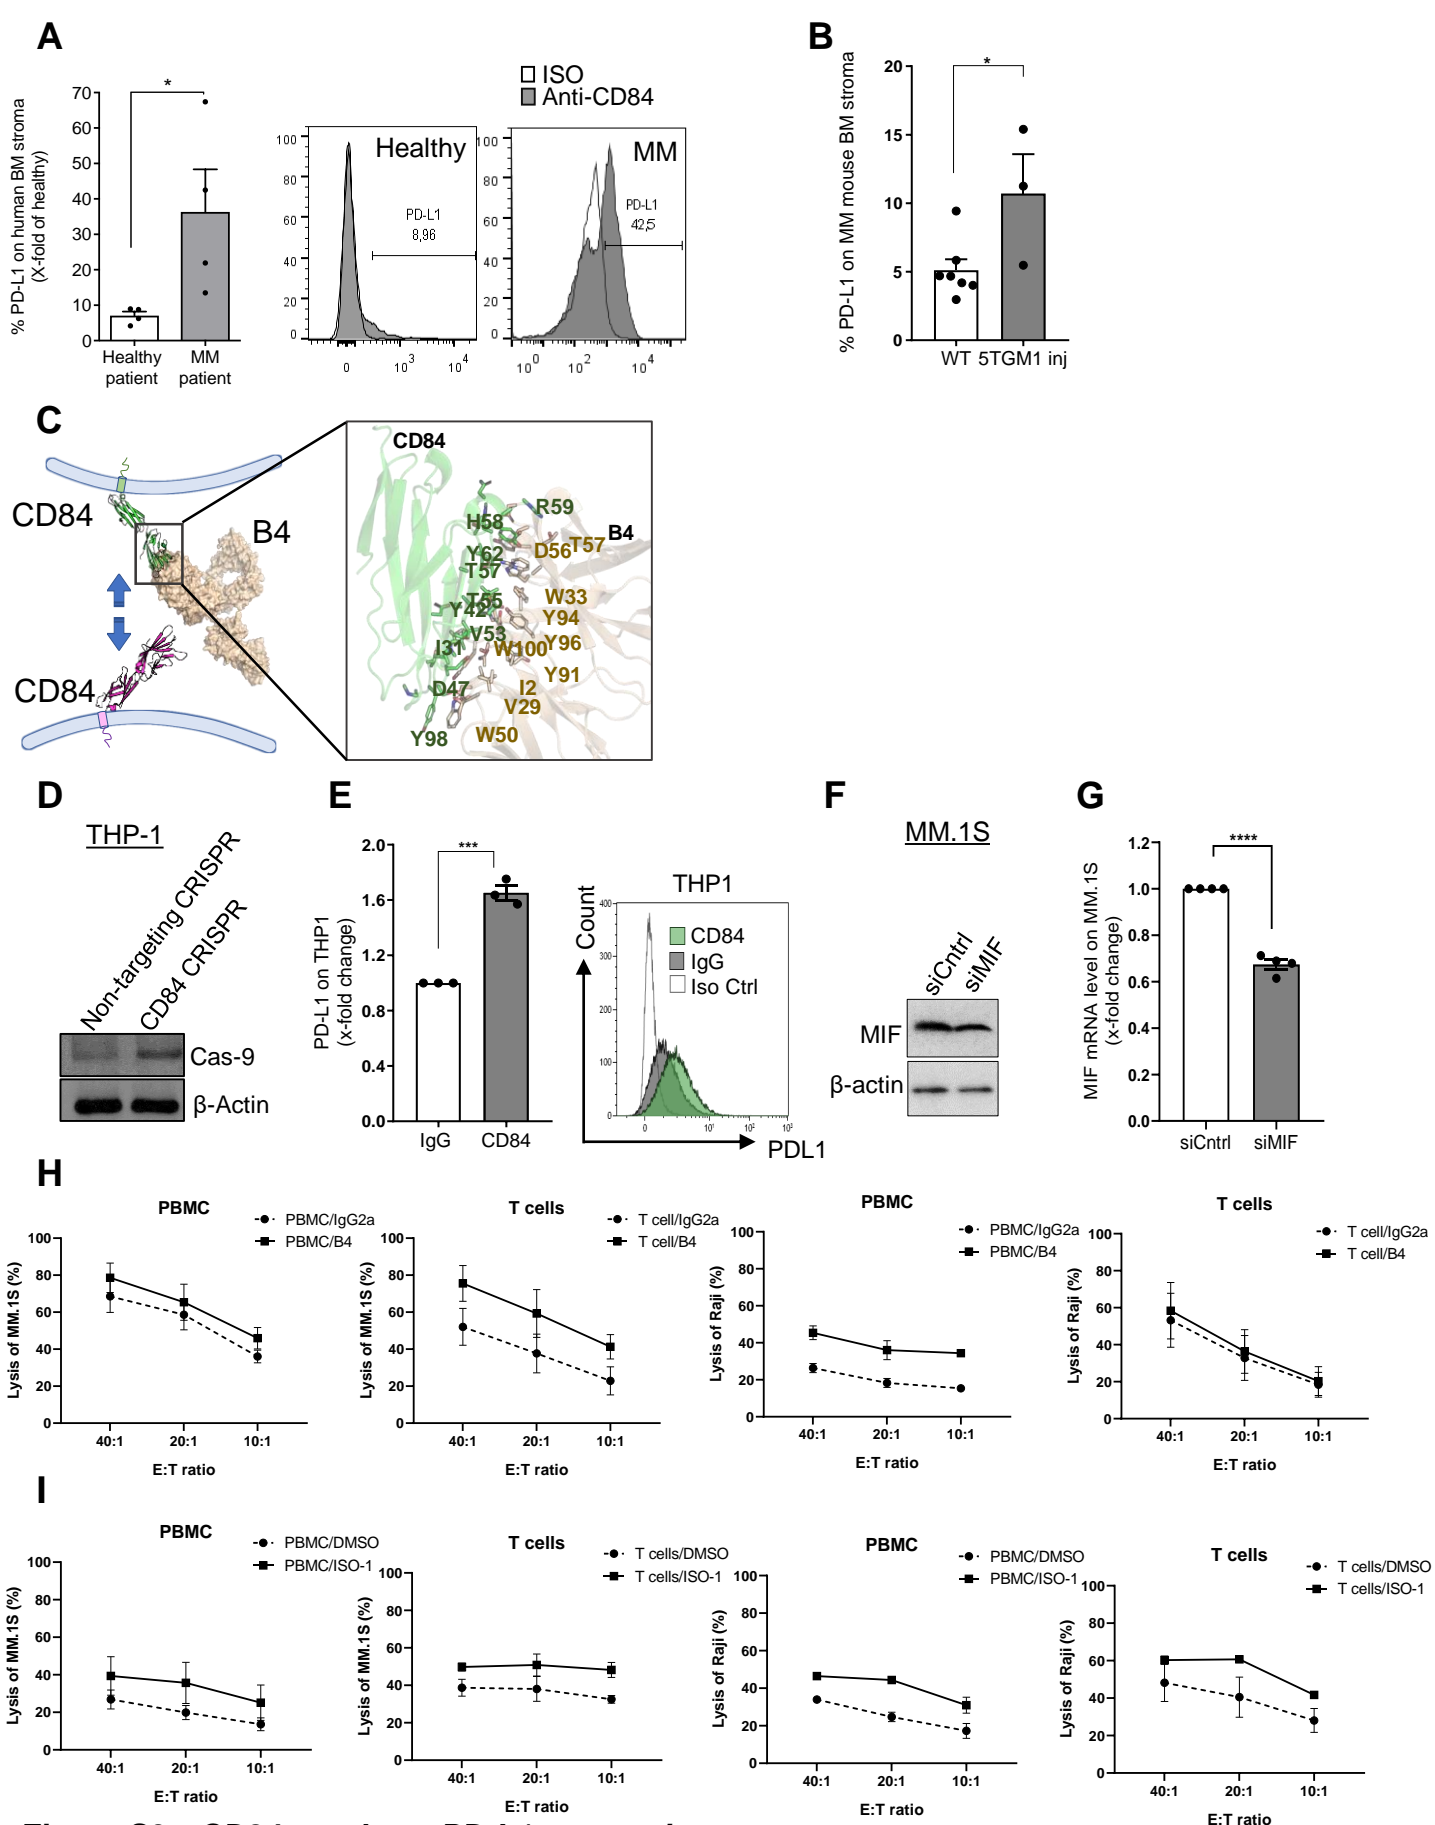

**Figure S3 - CD84 regulates PD-L1 expression**

**(A)** Bone marrow aspirates from healthy donors or MM patients were grown in culture. PD-L1 cell surface levels were analyzed by FACS. Representative histograms are shown on the right ( $n=4$ ,  $*p<0.05$ ). **(B)** PD-L1 expression on stroma grown from BM of 5TGM1 injected C57BL/KaLwRij WT mice ( $n=3-6$ ,  $*p<0.05$ ). **(C)** The model for B4 binding to CD84. The Schrodinger Antibody Modeling Interface was used to predict the structure of the B4 antibody, ZDOCK for the prediction of antibody-antigen complex, and Prime-MMGBSA for optimization and calculation of binding free energy. The complex with the lowest binding free energy was selected. The predicted structure shows a binding free energy of  $-100$  kcal/mol, indicative of strong binding. **(D)** LentiCRISPR-v2 CRISPR/Cas9 system was established in THP1 cell line with constitutive knockout of CD84 expression, the expression of Cas9 was determined by western blot analysis. **(E)** PD-L1 expression level on THP1 cells upon 48 hrs stimulation with an agonistic anti-CD84 ( $n=3$ ,  $***p<0.001$ ). **(F-G)** MM.1S cells were transfected with MIF or control siRNAs, 48hrs. The transfected cells were analyzed for MIF protein and mRNA levels with WB and qPCR, respectively  $n=4$ ,  $*p<0.05$ , paired t-test. **(H-I)** Cr-51 release assay for killing of MM.1S and Raji cells. Cr-51 labelled MM.1S and Raji cells (control cell line) were incubated with effector cells in 40:1, 20:1 and 10:1 effector-to-target ratios with B4 and ISO-1 or IgG2a and DMSO controls for 16 hrs at 37°C. Supernatants were collected and the released Cr-51 was counted using a gamma counter. Results represent the mean from three independent experiments.



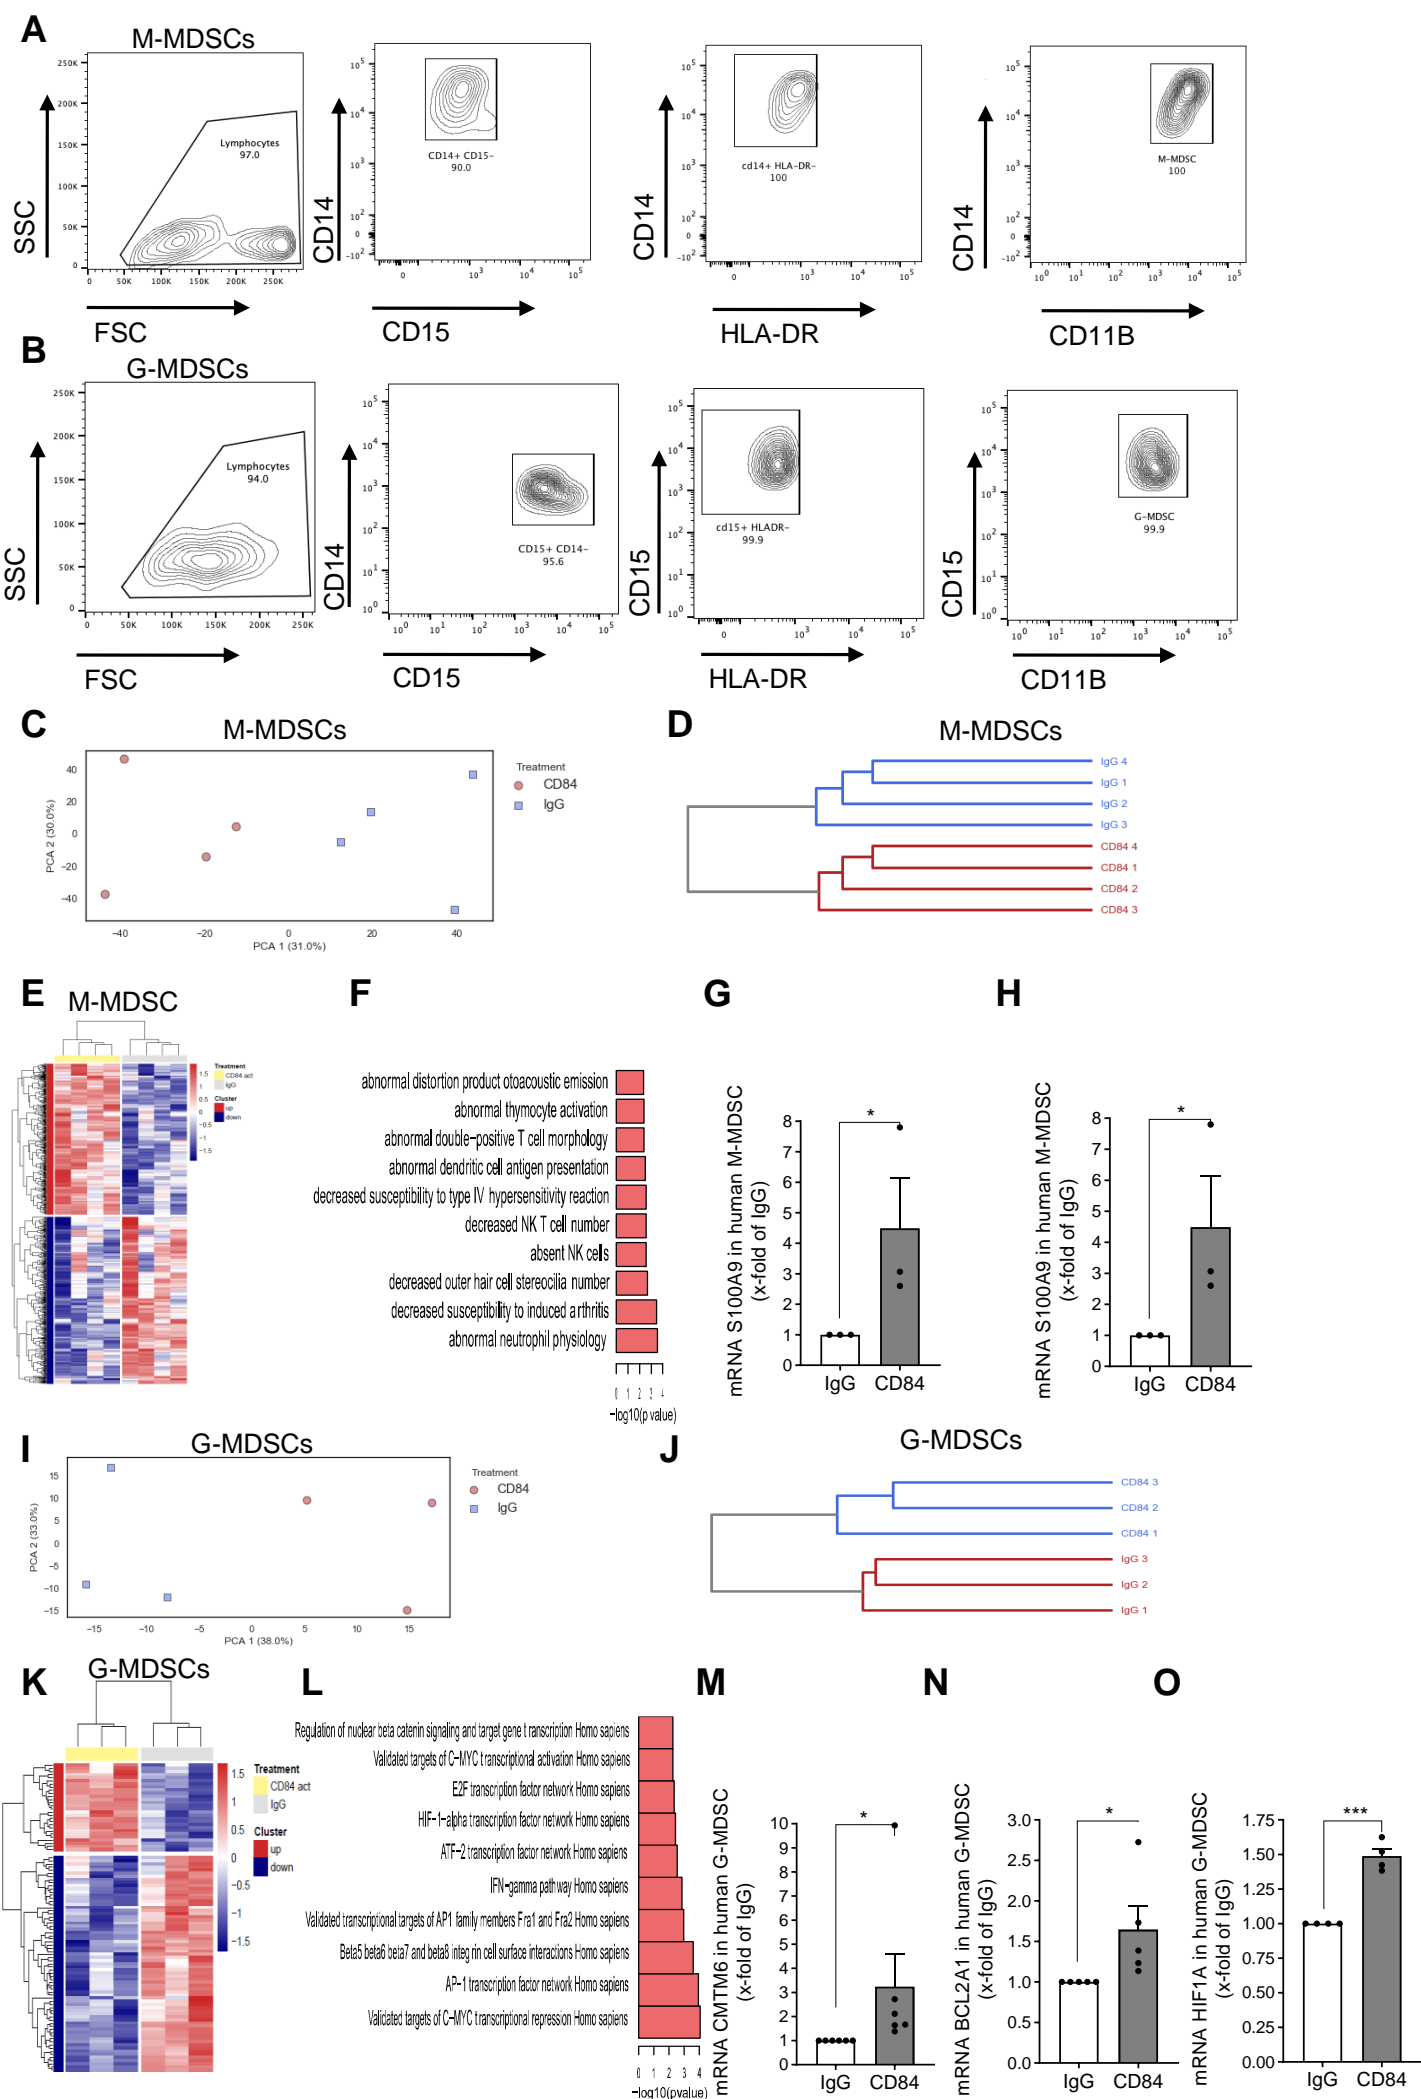

**Figure S4 - CD84 induced cascades in MDSCs**

(A-B) M-MDSCs (CD14<sup>+</sup>, CD15<sup>-</sup>, HLA-DR<sup>-</sup>, CD11B<sup>+</sup>) (A), or G-MDSCs (CD15<sup>+</sup>, CD14<sup>-</sup>, HLA-DR<sup>-</sup>, CD11B<sup>+</sup>) (B) derived from BM aspirates were sorted. Dot plots show the sorted populations. (C) Principal component analysis of M-MDSCs following RNA-seq. (D) Dendrogram of M-MDSCs following RNA-seq. (E) Heatmap of all differentially expressed genes from M-MDSC RNA-seq. (F) Highlighted gene ontology terms from the upregulated DE genes of M-MDSCs (MGI Mammalian Phenotype 2019, Enrich R). (G-H) S100A9 (G) and CYBA (H) mRNA expression by qPCR (n=3, \*p<0.05, paired t-test). (I) Principal component analysis of G-MDSCs following RNA-seq. (J) Dendrogram of G-MDSCs following RNA-seq. (K) Heatmap of all differentially expressed genes from G-MDSCs RNA-seq. (L) Highlighted gene ontology terms from the upregulated DE genes of G-MDSCs (NCI Nature 2016, Enrich R). (M-O) CMTM6 (M), BCL2A1 (N) and HIF1A (O) mRNA levels were determined by qRT-PCR (n=6, \*p<0.05, \*\*\*p<0.001, paired t-test).

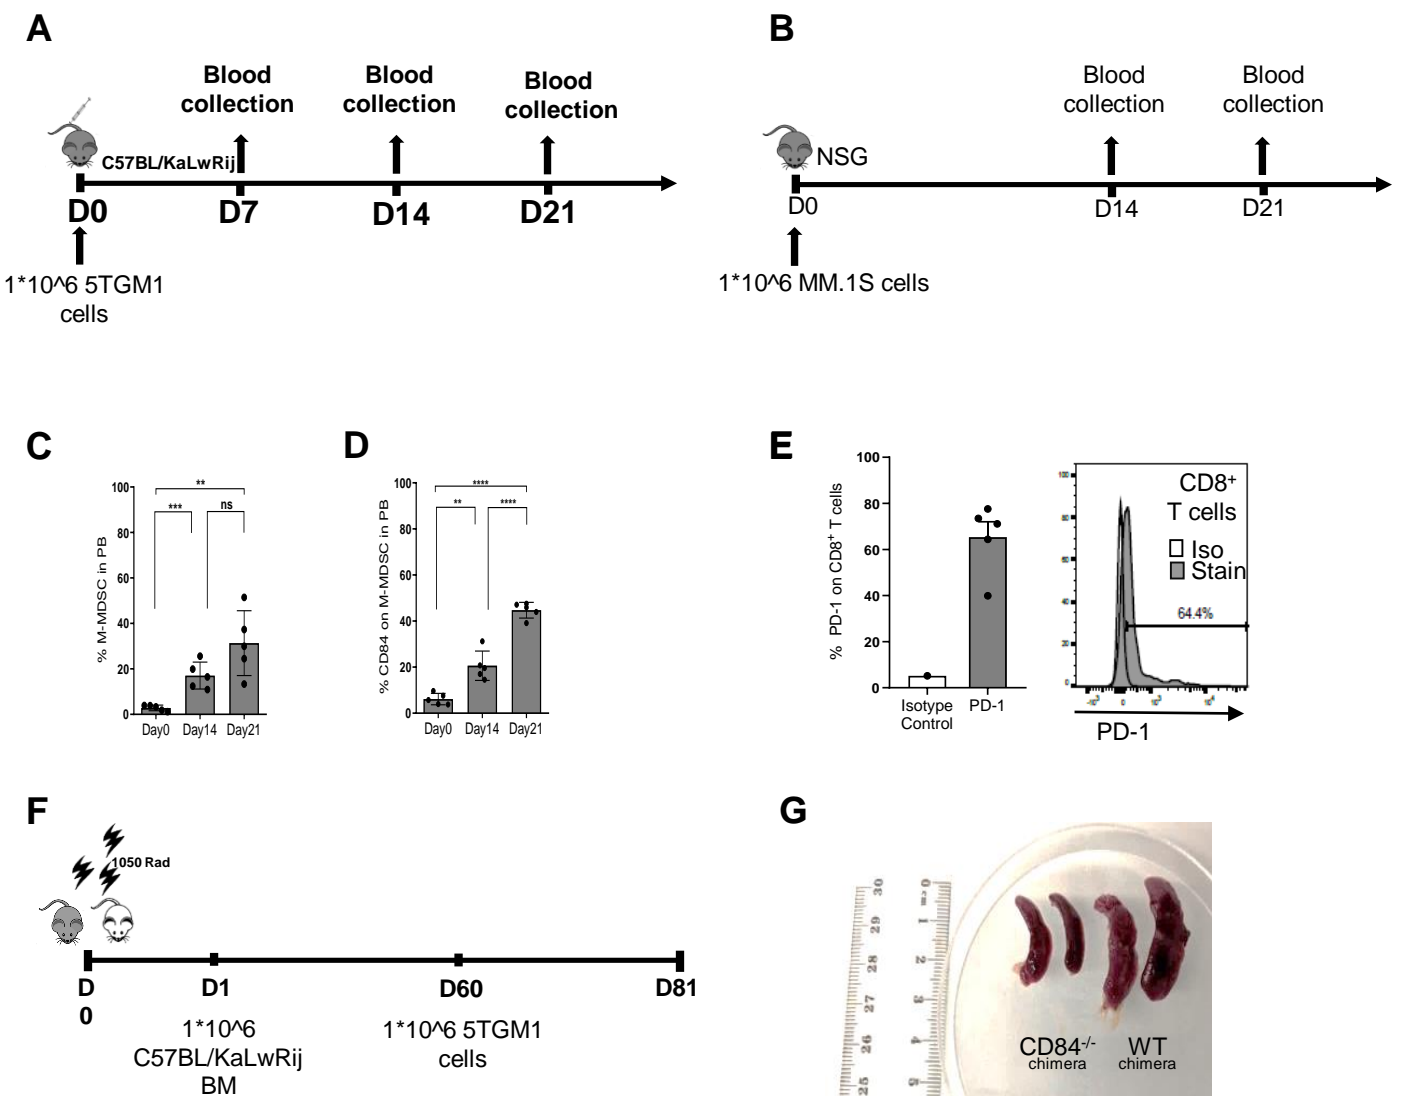

**Figure S5 - The *in vivo* role of CD84**

**(A) A-C)** Schematic depiction of the experimental protocol for 5TGM1 cells I.V. injected into syngeneic immune-competent C57BL/KaLwRij mice. PB samples were collected and analysed after 1 week, 2 weeks, and 3 weeks by weekly submandibular bleeding after the injection. **(B-D)** MM.1S cells were injected by I.V. into immuno-deficient NSG mice. After MM cell engraftment, peripheral blood from the mice were collected by submandibular bleeding once a week. Experimental scheme of the study (B), PB M-MDSC percentage (C) and CD84 expression on these cells (D) by FACS ( $n=5$ , M-MDSC  $**p < 0.01$ ,  $n=5$ , CD84+ M-MDSC,  $****p < 0.0001$ ). **(E)** PD-1 expression was analyzed on bone marrow CD8+ T cells by FACS ( $n=5$ ). **(F-G)** WT or CD84<sup>-/-</sup> mice were irradiated with 1050 Rad and injected with  $1 \times 10^6$  C57BL/KaLwRij BM cells after 1 day. After 60 days, the mice were injected with  $1 \times 10^6$  5TGM1 cells. After an additional 21 days, the mice were sacrificed, and their bone marrow, blood and spleens analysed. (F) The experimental model. (G) Photograph of WT and CD84 deficient spleens.

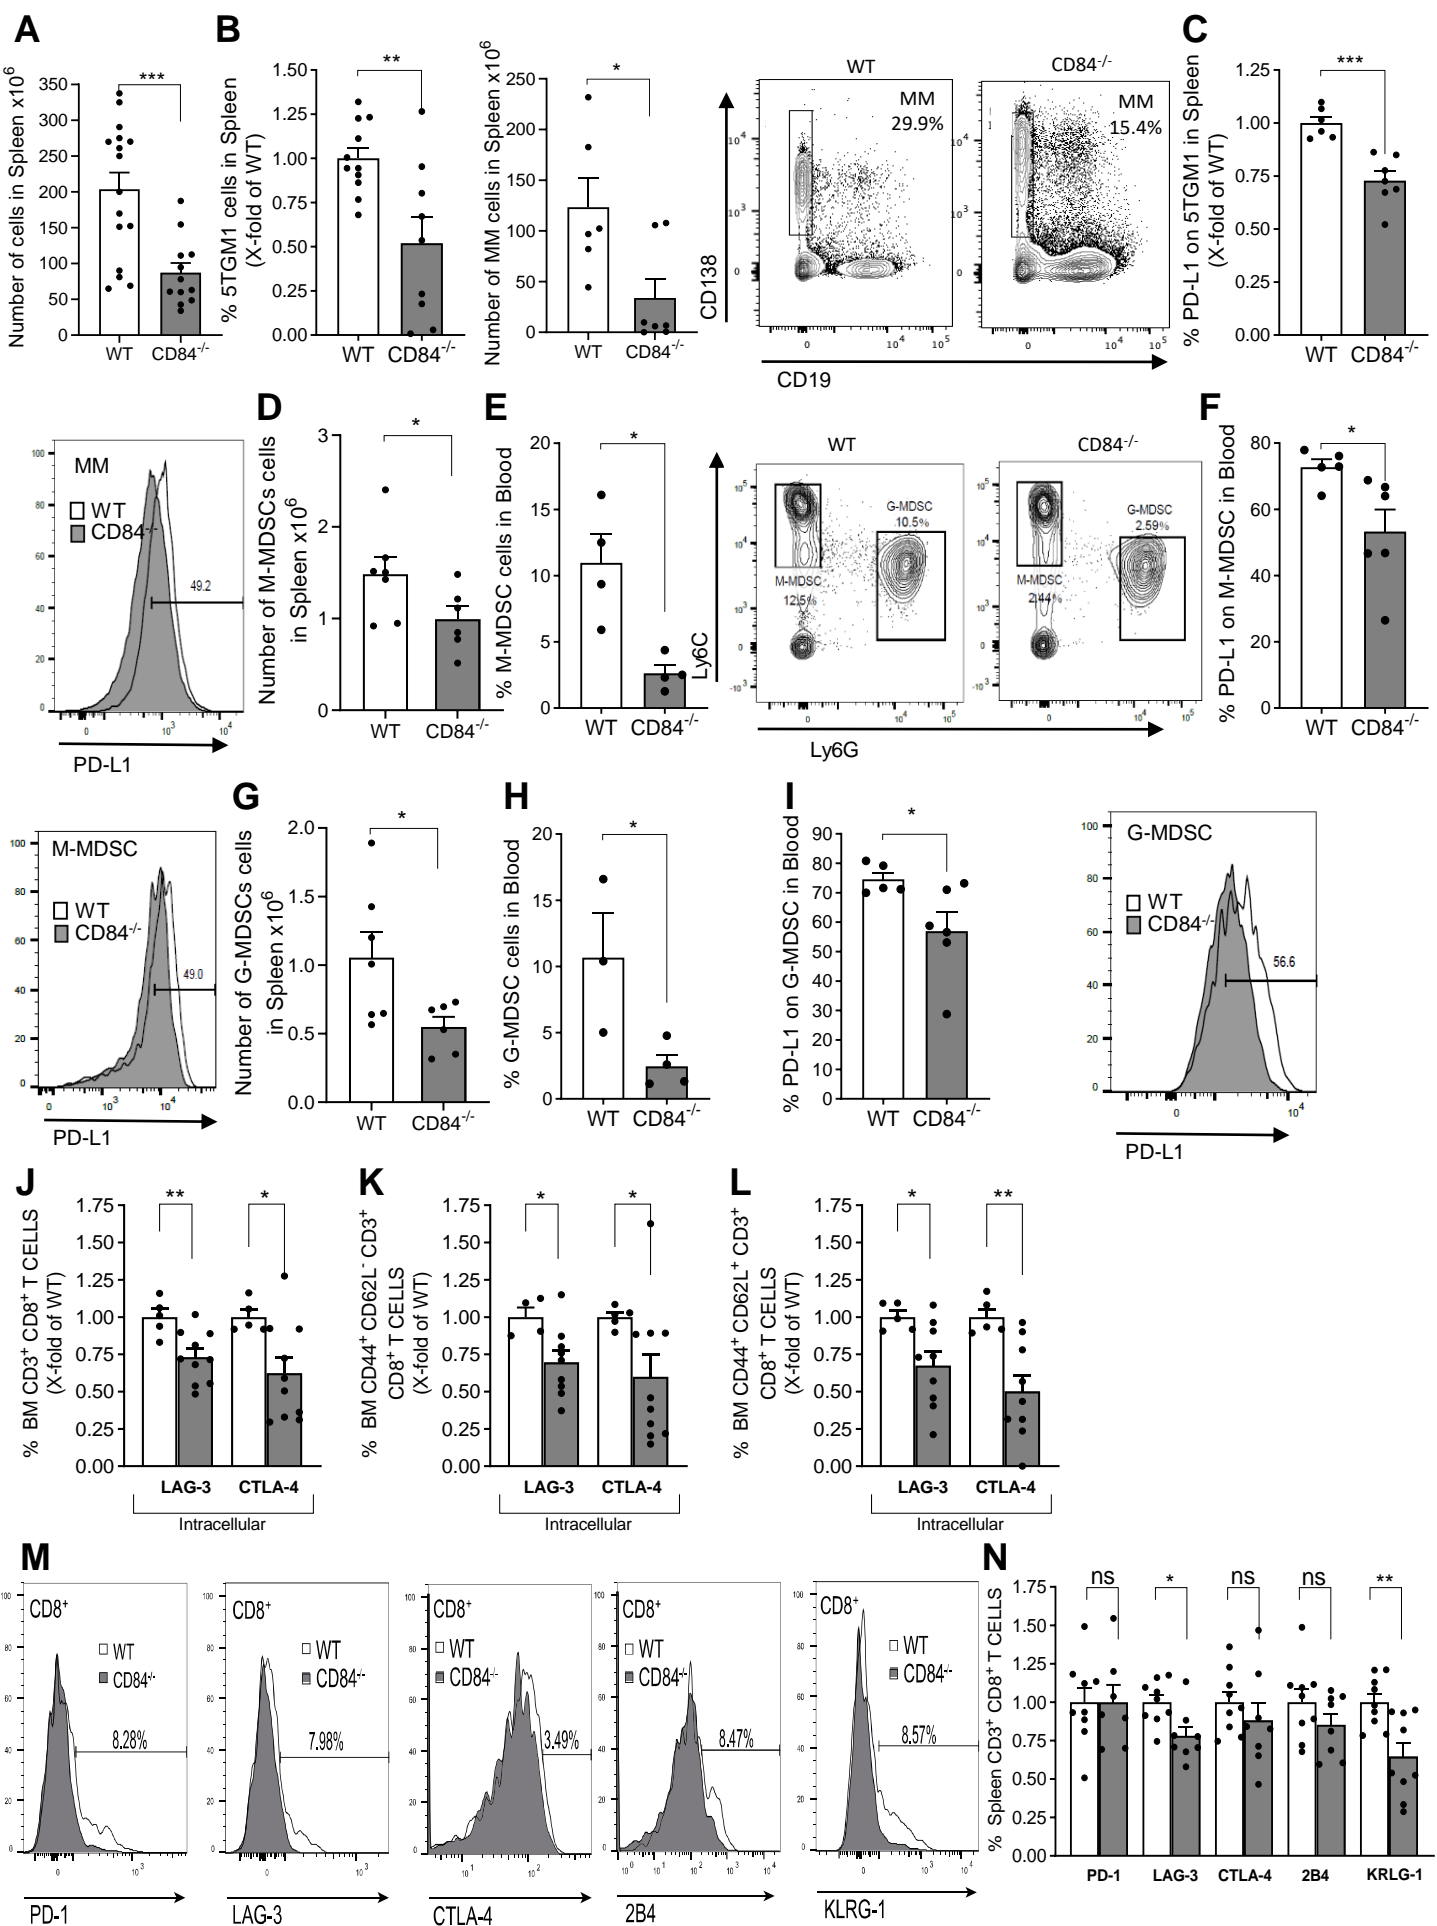

**Figure S6- CD84 deficiency reduces tumor load, MDSCs function and induce T cell activity**

CD84<sup>-/-</sup> mice backcrossed to C57BL/KaLwRij for 6-7 generations and C57BL/KaLwRij mice were injected with 5TGM1 cells. After 28 days, the mice were sacrificed and their bone marrow, blood and spleens were analyzed. **(A)** Cell numbers in spleens (n=12-16, \*\*\*p<0.001). **(B)** Percentage and number of MM cells in the spleen. Representative dot plots shown on the right (n=6-11, \*\*p<0.01). **(C)** Percentage of PD-L1 on MM cells in the spleen. Representative dot plots shown on the right (n=6, \*\*\*p<0.001). **(D)** Number of M-MDSCs in spleen (n=6-7, \*p<0.05, one-tailed T-test). **(E)** Percent of M-MDSCs in peripheral blood. Representative dot plot are shown in the right (n=5-6, \*p<0.05). **(F)** PD-L1 expression levels on M-MDSCs derived from peripheral blood. Representative histogram shown on the right (n=4, \*p<0.05). **(G)** Percent of G-MDSCs in peripheral blood. (n=3-4, \*p<0.05). **(H)** Number of G-MDSCs in spleen (n=6-7, \*p<0.05). **(I)** PD-L1 levels on PB G-MDSCs in peripheral blood with representative histogram shown (n=5-6, \*p<0.05). **(J-L)** BM CD8<sup>+</sup> T cells were analyzed for LAG-3 and CTLA-4 intracellularly in all T cells (K), in the effector memory subset (L) and central memory subset (M) n=4-10, \*p<0.05, \*\*p<0.01). **(M)** Representative plots for BM derived T cells analyzed for PD-1, LAG-3, CTLA-4, 2B4 and KLRG-1. **(N)** Splenic T cells were analyzed for PD-1, LAG-3, CTLA-4, 2B4 and KLRG-1 (n=7-9, ns>0.05, \*p<0.05, \*\*p<0.01).

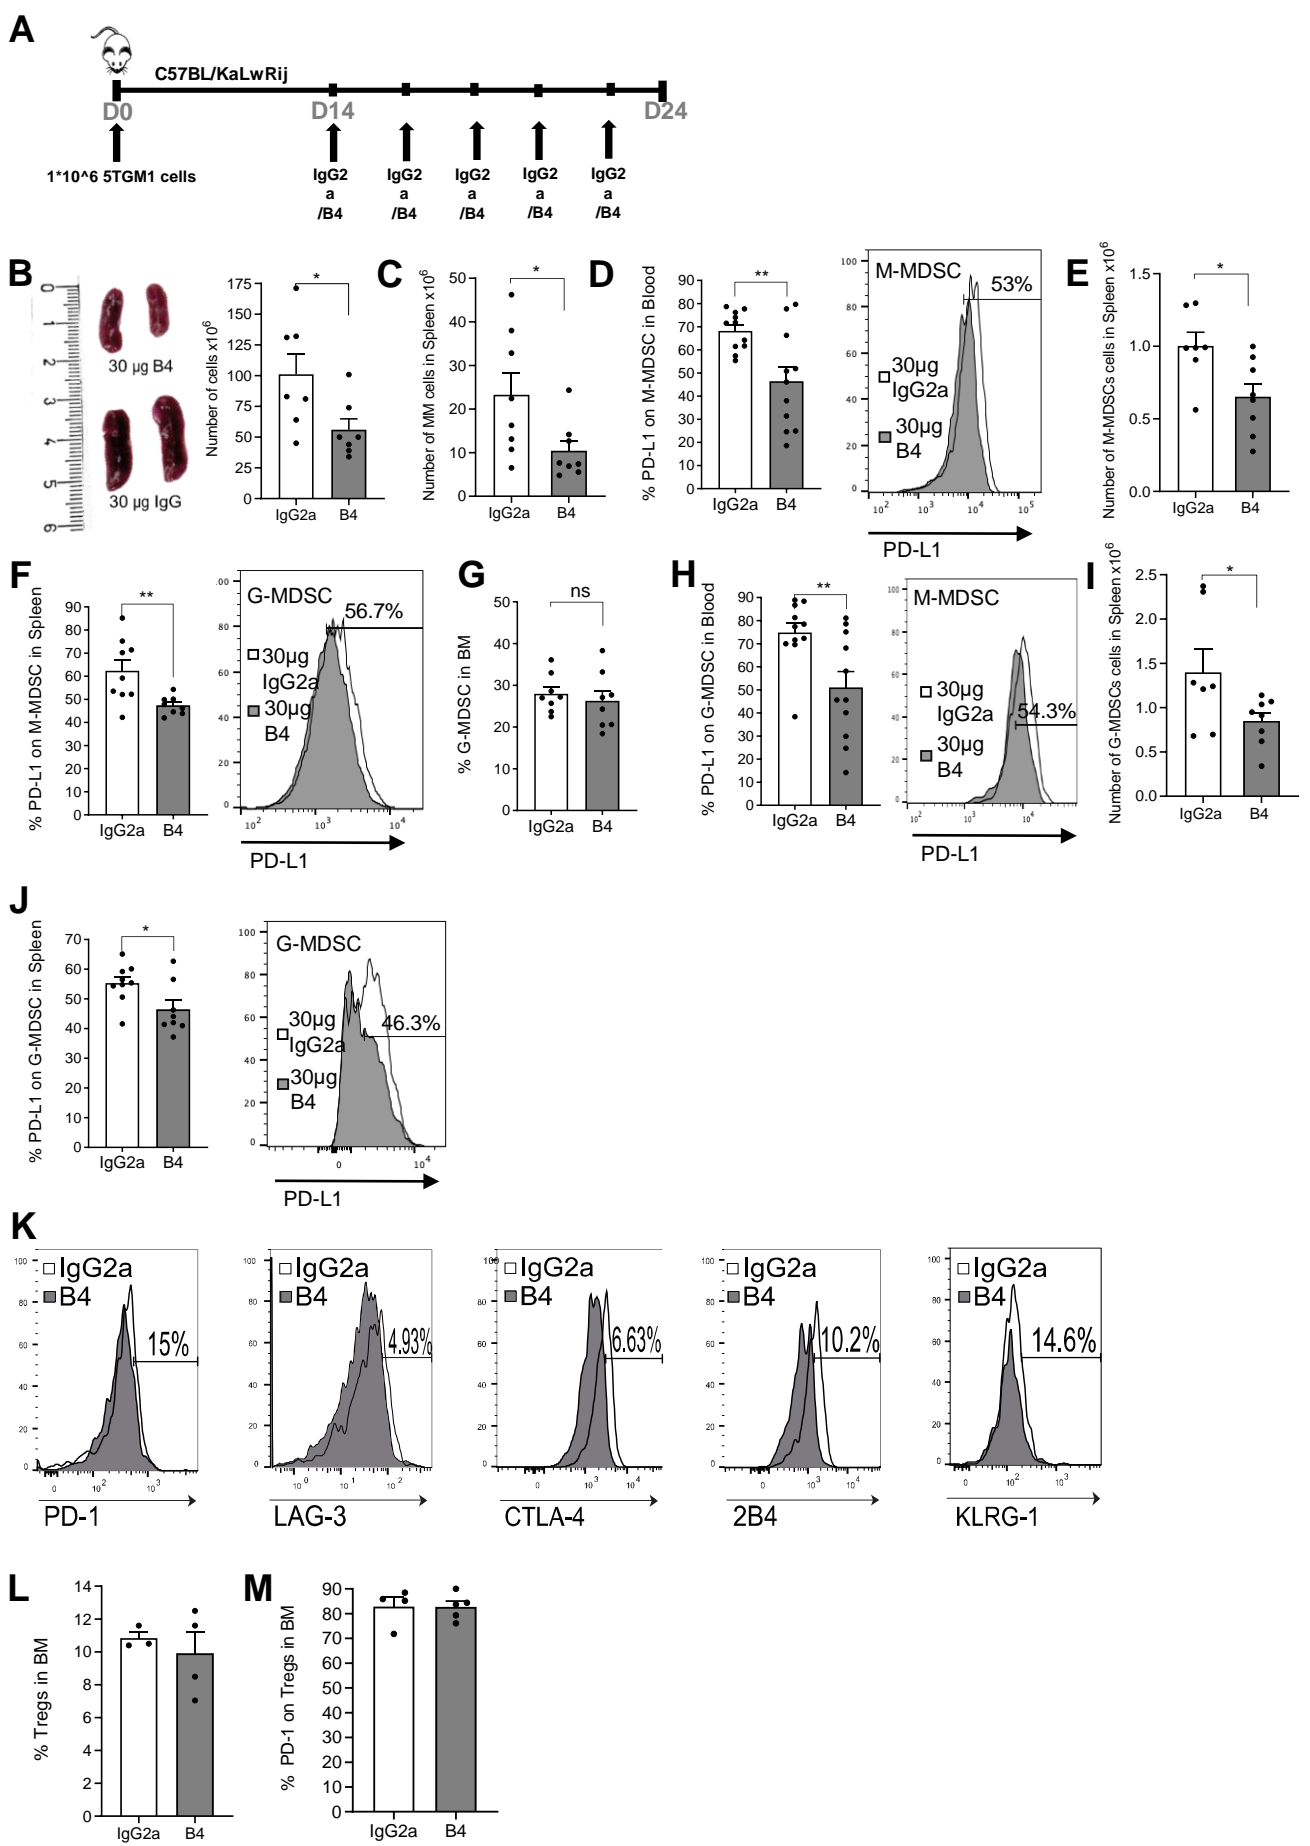

**Figure S7- B4 has a therapeutic effect on MM induced mice.**

(A-M) C57BL/KaLwRij mice were injected with  $1 \times 10^6$  5TGM1 cells. After 2 weeks, the mice were divided into two groups and treated either with five injections of 30 mg anti-CD84 blocking antibody, B4, or IgG2a control for five injections. (A) The experimental settings. (B) Pictures of spleens derived from B4 or IgG2a treated mice and cell numbers ( $n=7$ ,  $*p<0.05$ ). (C) Number of MM cells in the spleen ( $n=8$ ,  $*p<0.05$ ). (D) Percent of PD-L1 protein levels on PB M-MDSCs cells in the blood ( $n=11$ ,  $**p>0.01$ ). (E) Number of M-MDSCs cells in the spleen ( $n=7-8$ ,  $*p<0.05$ ). (F) Percent of PD-L1 on M-MDSCs cells in the spleen ( $n=8-9$ ,  $**p>0.01$ ). (G) Percent of G-MDSCs cells in the bone marrow ( $n=8$ ,  $p>0.05$ ). (H) Percentage of PD-L1 expressed on PB G-MDSCs ( $n=11$ ,  $**p>0.01$ ). (I) Number of G-MDSCs cells in the spleen ( $n=7-8$ ,  $*p<0.05$ ). (J) Percentage of PD-L1 expressed splenic G-MDSCs ( $n=11$ ,  $**p>0.01$ ). (K) PD-1, LAG-3, CTLA-4, 2B4 and KLRG-1 were analyzed on bone marrow-derived T cells by FACS. Representative histograms are provided. (L) Percent of Tregs in the bone marrow ( $n=3-4$ ,  $p=0.58$ ). (M) Percentage of PD-1 on Tregs in the bone marrow ( $n=4$ ,  $p=0.97$ ).

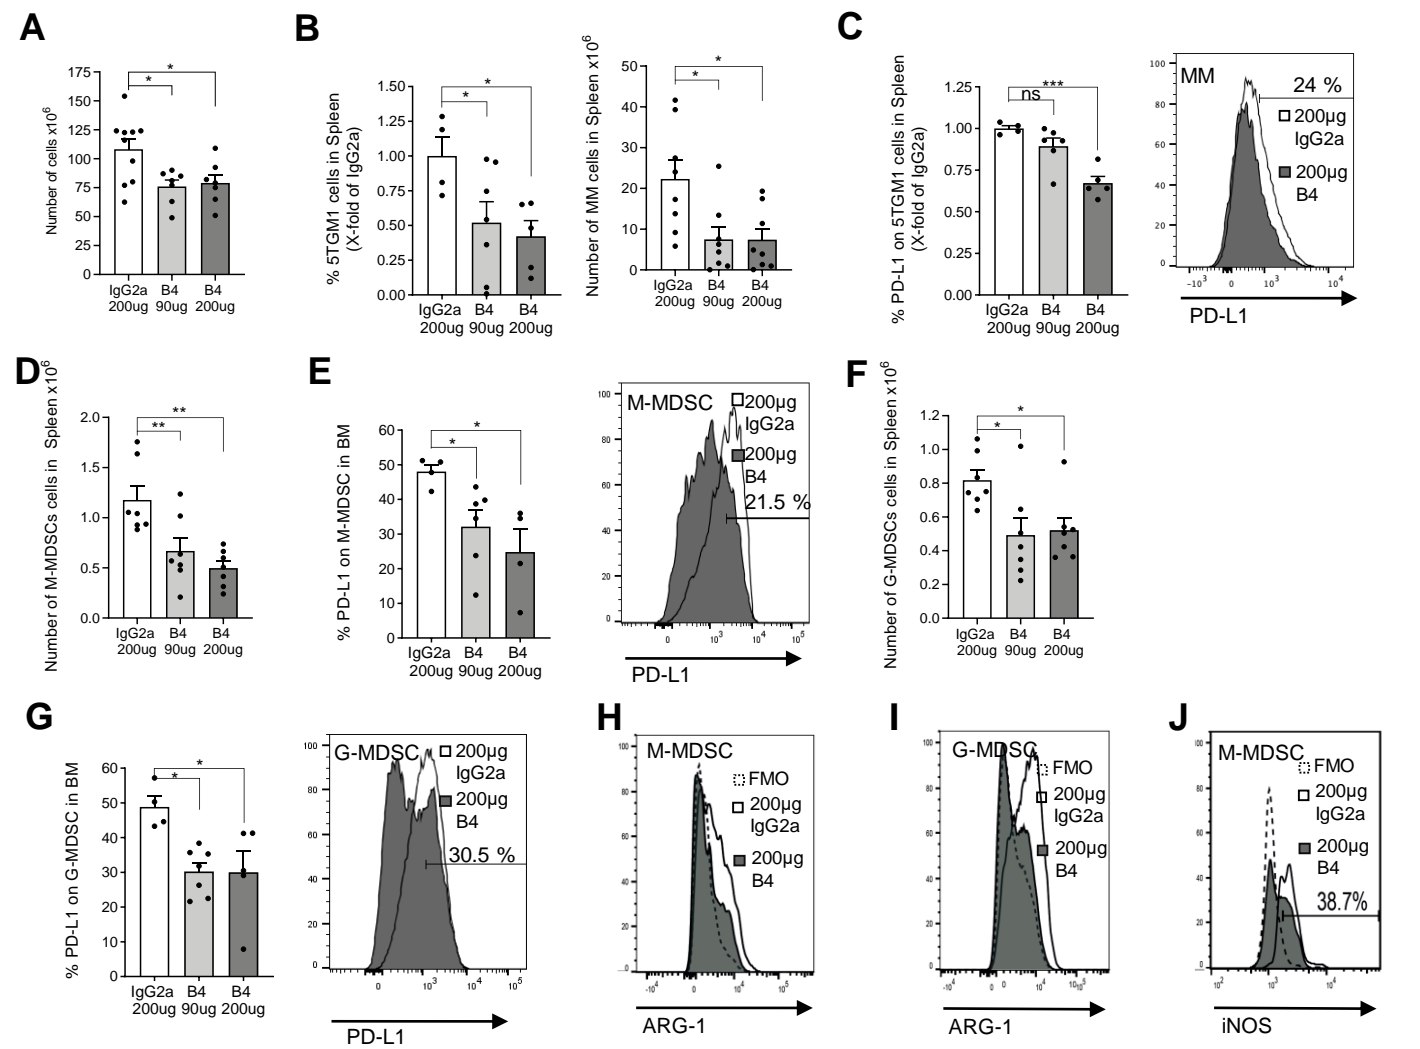

**Figure S8 - B4 has a dose-dependent therapeutic effect on MM induced mice.**

(A-J) C57BL/KaLwRij mice were injected with  $1 \times 10^6$  5TGM1 cells. After 2 weeks, the mice were divided into three groups and treated five times with 90  $\mu$ g or 200  $\mu$ g of B4, or 200  $\mu$ g IgG2a. (A) Spleen cell numbers ( $n=7$ ,  $*p < 0.05$ ) (B) Percent and number of MM cells in the spleen ( $n=4-7$ ,  $*p < 0.05$ , one-way ANOVA with Holm-Sidak multiple corrections test). (C) Percent of PD-L1 on MM cells in the spleen. Representative histograms are shown on the right ( $n=4-6$ ,  $***p < 0.001$ , one-way ANOVA with Holm-Sidak multiple corrections test). (D) Number of M-MDSC cells in the spleen ( $n=7-8$ ,  $**p < 0.01$ , one-way ANOVA with Holm-Sidak multiple corrections test). (E) Percentage of PD-L1 on BM M-MDSCs. Representative histograms shown on the right ( $n=4-6$ ,  $*p < 0.05$ , one-way ANOVA with Newman-Keuls corrections test). (F) Number of G-MDSC cells in the spleen ( $n=7-8$ ,  $**p < 0.01$ , one-way ANOVA with Holm-Sidak multiple corrections test). (G) Percent of PD-L1 on BM G-MDSCs. Representative histograms are shown on the right ( $n=4-7$ ,  $*p < 0.05$ , one-way ANOVA with Holm-Sidak multiple corrections test). (H-J) ARG-1 (H-I) and iNOS (J) were analyzed on bone marrow-derived MDSCs by FACS. Representative histograms are provided.
